# Supplementary material for: A Genetic Resource for Rice Improvement：introgression Library of Agronomic Traits for All AA&nbsp;Genome Species in Genus Oryza
Source: Research Square preprint supplement (doi:10.21203/rs.3.rs-174988/v1), 2021-02-04
Supplement: Supplementary file 1 [file e2fa6df8318c01e3d7efa427.xlsx]

## Sheet: Sheet1
Accession ID	Species	Original producing area
Acc.80575	O.nivara	India
Acc.80580	O.nivara	India
Acc.80581	O.nivara	India
Acc.80611	O.nivara	India
Acc.80625	O.nivara	India
Acc.80677	O.nivara	India
Acc.80681	O.nivara	India
Acc.80722	O.nivara	Myanmar
Acc.80724	O.nivara	Myanmar
Acc.81867	O.nivara	India
Acc.82005	O.nivara	India
Acc.82012	O.nivara	India
Acc.100195	O.nivara	Myanmar
Acc.100593	O.nivara	ThaiIand
Acc.101508	O.nivara	India
Acc.80453	O.nivara	India
Acc.80696	O.nivara	India
Acc.81855	O.nivara	India
Acc.102167	O.nivara	India
GS NO.18255	O.nivara	India
Acc.80433	O.rufipogon	India
Acc.80680	O.rufipogon	India
Acc.81976	O.rufipogon	Indonesia
Acc.81984	O.rufipogon	Laos
Acc.81986	O.rufipogon	Cambodia
Acc.81994	O.rufipogon	Papua New Guinea
Acc.82011	O.rufipogon	India
Acc.100639	O.rufipogon	Taiwan
Acc.103308	O.rufipogon	Taiwan
Acc.103884	O.rufipogon	ThaiIand
Acc.105832	O.rufipogon	ThaiIand
Acc.106133	O.rufipogon	India
Acc.106138	O.rufipogon	India
Acc.106340	O.rufipogon	Myanmar
Acc.80570	O.rufipogon	India
Acc.102159	O.rufipogon	ThaiIand
PCR9607	O.rufipogon	ThaiIand
Dongxiang common wild rice	O.rufipogon	China
Yuanjiang common wild rice	O.rufipogon	China
Acc.101145	O.meridionalis	Australia
Acc.101147	O.meridionalis	Australia
Acc.103322	O.meridionalis	Australia
Acc.104085	O.meridionalis	Australia
Acc.104498	O.meridionalis	Australia
Acc.105279	O.meridionalis	Australia
Acc.105298	O.meridionalis	Australia
Acc.82031	O.meridionalis	Australia
Acc.82032	O.glumaepatula	BraziI
Acc.100184	O.glumaepatula	BraziI
Acc.101960	O.glumaepatula
Acc.104386	O.glumaepatula	VenezuaIe
Acc.105661	O.glumaepatula	BraziI
Acc.105662	O.glumaepatula	BraziI
Acc.100117	O.barthii	Guinea
Acc.100936	O.barthii	Niger
Acc.101051	O.barthii	Africa
Acc.101196	O.barthii	Cameroom
Acc.103895	O.barthii	Senegal
Acc.104061	O.barthii	Niger
Acc.104284	O.barthii	Mali
Acc.104613	O.barthii	Guinea
Acc.101255	O.barthii	Cameroom
Acc.104103	O.barthii	Chad
Acc.104138	O.barthii	Cameroom
Acc.105507	O.barthii	Mali
Acc.105987	O.barthii	Cameroom
No.5496	O.longistaminata
IRGC100127	O. glaberrima	IRRI Bank
IRGC100140	O. glaberrima	IRRI Bank
IRGC100149	O. glaberrima	IRRI Bank
IRGC100156	O. glaberrima	IRRI Bank
IRGC100160-1	O. glaberrima	IRRI Bank
IRGC100160-2	O. glaberrima	IRRI Bank
IRGC101838	O. glaberrima	IRRI Bank
IRGC101842	O. glaberrima	IRRI Bank
IRGC101854	O. glaberrima	IRRI Bank
IRGC101856	O. glaberrima	IRRI Bank
IRGC101898	O. glaberrima	IRRI Bank
IRGC101901	O. glaberrima	IRRI Bank
IRGC102046	O. glaberrima	IRRI Bank
IRGC102244	O. glaberrima	IRRI Bank
IRGC102254	O. glaberrima	IRRI Bank
IRGC102295	O. glaberrima	IRRI Bank
IRGC102304	O. glaberrima	IRRI Bank
IRGC102305	O. glaberrima	IRRI Bank
IRGC102310	O. glaberrima	IRRI Bank
IRGC102316	O. glaberrima	IRRI Bank
IRGC102338	O. glaberrima	IRRI Bank
IRGC102370	O. glaberrima	IRRI Bank
IRGC102375	O. glaberrima	IRRI Bank
IRGC102482	O. glaberrima	IRRI Bank
IRGC102509	O. glaberrima	IRRI Bank
IRGC102513	O. glaberrima	IRRI Bank
IRGC102540	O. glaberrima	IRRI Bank
IRGC102555	O. glaberrima	IRRI Bank
IRGC102556	O. glaberrima	IRRI Bank
IRGC102583	O. glaberrima	IRRI Bank
IRGC102601	O. glaberrima	IRRI Bank
IRGC102614	O. glaberrima	IRRI Bank
IRGC102671	O. glaberrima	IRRI Bank
IRGC102692	O. glaberrima	IRRI Bank
IRGC102718	O. glaberrima	IRRI Bank
IRGC102720	O. glaberrima	IRRI Bank
IRGC102724	O. glaberrima	IRRI Bank
IRGC102726	O. glaberrima	IRRI Bank
IRGC102846	O. glaberrima	IRRI Bank
IRGC102864	O. glaberrima	IRRI Bank
IRGC102928	O. glaberrima	IRRI Bank
IRGC102933	O. glaberrima	IRRI Bank
IRGC102939	O. glaberrima	IRRI Bank
IRGC102949	O. glaberrima	IRRI Bank
IRGC102950	O. glaberrima	IRRI Bank
IRGC102986	O. glaberrima	IRRI Bank
IRGC103143	O. glaberrima	IRRI Bank
IRGC103144	O. glaberrima	IRRI Bank
IRGC103145	O. glaberrima	IRRI Bank
IRGC103146	O. glaberrima	IRRI Bank
IRGC103147	O. glaberrima	IRRI Bank
IRGC103232	O. glaberrima	IRRI Bank
IRGC103450	O. glaberrima	IRRI Bank
IRGC103466	O. glaberrima	IRRI Bank
IRGC103469	O. glaberrima	IRRI Bank
IRGC103470	O. glaberrima	IRRI Bank
IRGC103475	O. glaberrima	IRRI Bank
IRGC103479	O. glaberrima	IRRI Bank
IRGC103481	O. glaberrima	IRRI Bank
IRGC103482	O. glaberrima	IRRI Bank
IRGC103483	O. glaberrima	IRRI Bank
IRGC103485	O. glaberrima	IRRI Bank
IRGC103502	O. glaberrima	IRRI Bank
IRGC103503	O. glaberrima	IRRI Bank
IRGC103530	O. glaberrima	IRRI Bank
IRGC103604	O. glaberrima	IRRI Bank
IRGC103612	O. glaberrima	IRRI Bank
IRGC103651	O. glaberrima	IRRI Bank
IRGC103930	O. glaberrima	IRRI Bank
IRGC103944	O. glaberrima	IRRI Bank
IRGC103956	O. glaberrima	IRRI Bank
IRGC103958	O. glaberrima	IRRI Bank
IRGC103970	O. glaberrima	IRRI Bank
IRGC103973	O. glaberrima	IRRI Bank
IRGC103976	O. glaberrima	IRRI Bank
IRGC103977	O. glaberrima	IRRI Bank
IRGC103983	O. glaberrima	IRRI Bank
IRGC103984	O. glaberrima	IRRI Bank
IRGC103996	O. glaberrima	IRRI Bank
IRGC103998	O. glaberrima	IRRI Bank
IRGC104000	O. glaberrima	IRRI Bank
IRGC104005	O. glaberrima	IRRI Bank
IRGC104021	O. glaberrima	IRRI Bank
IRGC104023	O. glaberrima	IRRI Bank
IRGC104024	O. glaberrima	IRRI Bank
IRGC104025	O. glaberrima	IRRI Bank
IRGC104026	O. glaberrima	IRRI Bank
IRGC104027	O. glaberrima	IRRI Bank
IRGC104032	O. glaberrima	IRRI Bank
IRGC104038	O. glaberrima	IRRI Bank
IRGC104039	O. glaberrima	IRRI Bank
IRGC104045	O. glaberrima	IRRI Bank
IRGC104049	O. glaberrima	IRRI Bank
IRGC104050	O. glaberrima	IRRI Bank
IRGC104158	O. glaberrima	IRRI Bank
IRGC104162	O. glaberrima	IRRI Bank
IRGC104163	O. glaberrima	IRRI Bank
IRGC104339	O. glaberrima	IRRI Bank
IRGC104586	O. glaberrima	IRRI Bank
Acc102528	O. glaberrima	IRRI Bank
Acc102627	O. glaberrima	IRRI Bank
CG14	O. glaberrima	WARDA
CG17	O. glaberrima	WARDA
ITA325	upland rice	IITA
IR55423-01	upland rice	IRRI
IR60080-46A	upland rice	IRRI
IR65907-206-7-B	upland rice	IRRI
WAB56-50	upland rice	WARDA
WAB450-16	upland rice	WARDA
Dourado Precoce	upland rice	Brazil
IAC1246	upland rice	Brazil
IAC165	upland rice	Brazil
IAC25	upland rice	Brazil
Maravilha	upland rice	Brazil
63-83	upland rice	West Africa
Moroberekan	upland rice	West Africa
OS6	upland rice	West Africa
IRAT13	upland rice	France
IRAT104	upland rice	France
IRAT216	upland rice	France
CIRAD 411	upland rice	France
AZUCENA	upland rice	Philippines
UPL RI-5	upland rice	Philippines
BR21	upland rice	Bangladesh
Dular	upland rice	India
Vandana	upland rice	India
B6144F-MR-6	upland rice	India
Yunlu 5	upland rice	YAAS
Yunlu 11	upland rice	YAAS
Yunlu 28	upland rice	YAAS
Yunlu 29	upland rice	YAAS
Yunlu 55	upland rice	YAAS
Yunlu 56	upland rice	YAAS
Yunlu 58	upland rice	YAAS
Yunlu 59	upland rice	YAAS
Yunlu 63	upland rice	YAAS
Yunlu 64	upland rice	YAAS
Yunlu 65	upland rice	YAAS
Yunlu 68	upland rice	YAAS
Yunlu 71	upland rice	YAAS
Yunlu 77	upland rice	YAAS
Yunlu 83	upland rice	YAAS
Yunlu 87	upland rice	YAAS
Yunlu 88	upland rice	YAAS
Yunlu 89	upland rice	YAAS
Yunlu 91	upland rice	YAAS
Yunlu 92	upland rice	YAAS
Yunlu 97	upland rice	YAAS
Yunlu 98	upland rice	YAAS
Yunlu 99	upland rice	YAAS
Dahonggu	upland rice	Gengma,China
Dahuigu	upland rice	Gengma,China
Fengqingyingzuigu	upland rice	Gengma,China
Hongxinnuo	upland rice	Gengma,China
Kaoruliang	upland rice	Gengma,China
Kaohanweng	upland rice	Gengma,China
Xiaobaigu	upland rice	Gengma,China
Xiaohonggu	upland rice	Gengma,China
Digunuo	upland rice	Honghe,China
Yaorengu	upland rice	Honghe,China
Huangpigu	upland rice	Jiangcheng, China
Kugu	upland rice	Jiangcheng, China
Wulugu	upland rice	Jiangcheng, China
Jiangchuanhangu	upland rice	Jiangchuan,China
Huakenuo	upland rice	Jianghe,China
Mengtigu	upland rice	Jianghe,China
Mengwanggu	upland rice	Jinghong, China
Aihonggu	upland rice	Lancang,China
Annangu	upland rice	Lancang,China
Bayuenuo	upland rice	Lancang,China
Bailandi	upland rice	Lancang,China
Baimalan	upland rice	Lancang,China
Banliyihao	upland rice	Lancang,China
Changmaogu	upland rice	Lancang,China
Hangu	upland rice	Lancang,China
Haohaozao	upland rice	Lancang,China
Haomenglong	upland rice	Lancang,China
Haopei	upland rice	Lancang,China
Haotunan	upland rice	Lancang,China
Huangpigu	upland rice	Lancang,China
Lamujia	upland rice	Lancang,China
Lancandabaigu	upland rice	Lancang,China
Landigu	upland rice	Lancang,China
Mazaogu	upland rice	Lancang,China
Mazhagu	upland rice	Lancang,China
Mowanggu	upland rice	Lancang,China
Niushigu	upland rice	Lancang,China
Sanlicun	upland rice	Lancang,China
Shoudidabaigu	upland rice	Lancang,China
wulugu	upland rice	Lancang,China
Xiaobaigu	upland rice	Lancang,China
Xiaogu	upland rice	Lancang,China
Zhaxima	upland rice	Lancang,China
Landigu	upland rice	Longling, China
Lunanhangu	upland rice	Lunan,China
Boyegu	upland rice	Lvchun,China
Dabaigu	upland rice	Lvchun,China
liandaogu	upland rice	Lvchun,China
Beizigu	upland rice	Menghai, China
Cangzugu	upland rice	Menghai, China
Haodali	upland rice	Menghai, China
Haomengnan	upland rice	Menghai, China
Haonanwen	upland rice	Menghai, China
Haonanda	upland rice	Menghai, China
Haonuohe	upland rice	Menghai, China
Honghangu	upland rice	Menghai, China
Hongnuogu	upland rice	Menghai, China
Huangpigu	upland rice	Menghai, China
Landibaigu	upland rice	Menghai, China
Landigu	upland rice	Menghai, China
Nanwushu	upland rice	Menghai, China
Shandibaigu	upland rice	Menghai, China
Xiaohonggu	upland rice	Menghai, China
Zhaluoge	upland rice	Menglian,China
Caopigu	upland rice	Mojiang,China
Hongjiaogu	upland rice	Mojiang,China
Jiudiheigu	upland rice	Mojiang,China
Jiudihuagu	upland rice	Mojiang,China
Mengmanbaigu	upland rice	Mojiang,China
Nandagu	upland rice	Mojiang,China
Shanerkuai	upland rice	Mojiang,China
Shannuo	upland rice	Mojiang,China
Shanzinuo	upland rice	Mojiang,China
Bailan	upland rice	Shizong,China
Chipanggu	upland rice	Shizong,China
Dahongguxuan-3	upland rice	Shizong,China
Hongxuan4	upland rice	Shizong,China
Jiaojiajingdabaigu	upland rice	Shizong,China
Genghong	upland rice	Shizong,China
Luxiangbai	upland rice	Shizong,China
Wulongdabaigu	upland rice	Shizong,China
Xiaohonggu	upland rice	Shizong,China
Yanzhinuo	upland rice	Shizong,China
Yuanhonggu	upland rice	Shizong,China
Zigu	upland rice	Shizong,China
Sanbang70luo	upland rice	Tengchong, China
Huangpigu	upland rice	Wenshan, China
Shoudidabaigu	upland rice	Wenshan, China
Yangbiguangkeludao	upland rice	Yangbi,China
Dabaigu	upland rice	Yuanyang,China
Canyuanhanzinuo	upland rice	Cangyuan,China
Qianshaohangu	upland rice
Zhenkangzaonuo	upland rice	Zhenkang,China
Digannuo	upland rice	Guangdong, China
Linghe	upland rice	Guangdong, China
Cehengguangkenuo	upland rice	Guizhou, China
Cehenghandao	upland rice	Guizhou, China
Cehengwuyanuo	upland rice	Guizhou, China
Dali"sanlicun"nuo	upland rice	Guizhou, China
Dejianggoudiantou	upland rice	Guizhou, China
Heiyungengnian	upland rice	Guizhou, China
Hongkegengnian	upland rice	Guizhou, China
Huangyingtaonuo	upland rice	Guizhou, China
Pingbahannuogu	upland rice	Guizhou, China
Qinghonghuangnuo	upland rice	Guizhou, China
Wangmofeienian	upland rice	Guizhou, China
Xiaohuanghongminian	upland rice	Guizhou, China
Xingrenhonghanniangu	upland rice	Guizhou, China
Xiuwenhongkeling	upland rice	Guizhou, China
Yougengdao	upland rice	Guizhou, China
Zhenfenghanqingnuo	upland rice	Guizhou, China
Zhouzhaihongkehandao	upland rice	Guizhou, China
Zunyihangu	upland rice	Guizhou, China
